# Supplementary material for: Chemical structure and dissolution behaviour of CaO and ZnO containing alkali-borosilicate glass
Source: Royal Society of Chemistry journal article supplement (doi:10.1039/d1ma01029h), 2022-01-01
Supplement: d1ma01029h1.pdf [file d1ma01029h1.pdf]

## Chemical structure and dissolution behaviour of CaO and ZnO containing alkali-borosilicate glass: Supplementary Material

Adam J. Fisher<sup>1</sup>, Hao Ding<sup>1</sup>, Prashant Rajbhandari<sup>1</sup>, Brant Walkley<sup>2</sup>, Lewis R. Blackburn<sup>1</sup>, Martin C. Stennett<sup>1</sup>, Russell J. Hand<sup>1</sup>, Neil C. Hyatt<sup>1</sup>, M. T. Harrison<sup>3</sup> and Claire L. Corkhill<sup>1\*</sup>

<sup>1</sup>NucleUS Immobilisation Science Laboratory, Department of Materials Science and Engineering, University of Sheffield, Sheffield, S1 3JD, UK

<sup>2</sup>Department of Chemical and Biological Engineering, University of Sheffield, S1 3JD, UK

<sup>3</sup>National Nuclear Laboratory, Sellafield, Seascale, Cumbria, CA20 1PG

\*Corresponding author: c.corkhill@sheffield.ac.uk

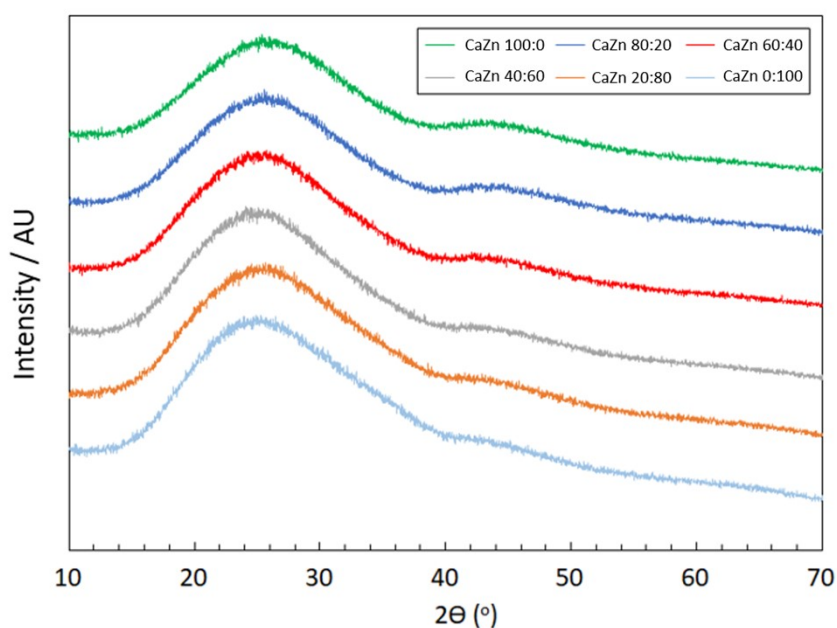

**Supplementary Figure 1.** X-ray Diffraction patterns acquired for the pristine Ca<sub>x</sub>Zn<sub>y</sub> lithium alkali-borosilicate glass series.

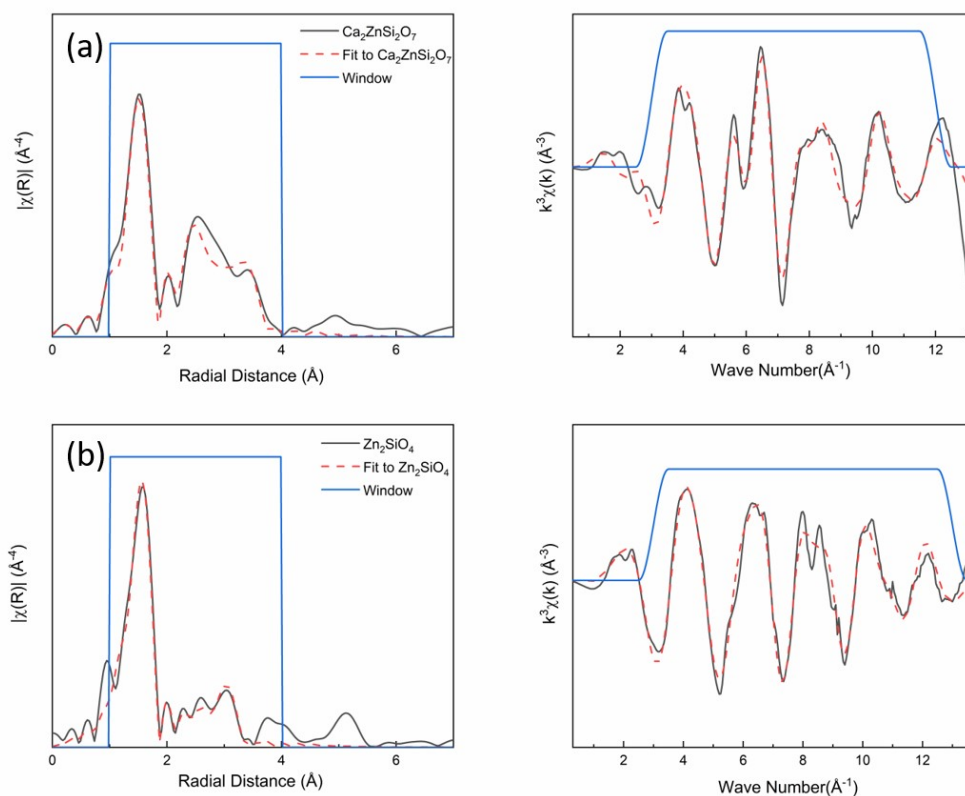

**Supplementary Figure 2.** Extended X-ray Absorption Fine Structure (EXAFS) spectrum in radial space and the corresponding  $k^3$ - weighted EXAFS for Zn-containing standards: (a) hardystonite ( $\text{Ca}_2\text{ZnSi}_2\text{O}_7$ ) and; (b) willemite ( $\text{Zn}_2\text{SiO}_4$ ).

**Supplementary Table 1.** Peak assignments and fitting shapes for  $^{11}\text{B}$  MAS NMR spectra used for the  $\text{Ca}_x\text{Zn}_y$  glass series.

| Coordination     | Peak          | Chemical shift / ppm | Fitting shape        | Comments                                                                                                                                                 |
|------------------|---------------|----------------------|----------------------|----------------------------------------------------------------------------------------------------------------------------------------------------------|
| $^{[3]}\text{B}$ | (a) ring      | 16.8 (approx)        | $Q_{\text{mas}} 1/2$ | Amplitude, width and chemical shift (ppm) were refinable.                                                                                                |
|                  | (b) non-ring  | 14.5 (approx)        | $Q_{\text{mas}} 1/2$ |                                                                                                                                                          |
| $^{[4]}\text{B}$ | (a) (1B, 3Si) | -1 (approx)          | Gaussian             | Amplitude, chemical shift (ppm), apodisation of theoretical lineshape, quadrupolar frequency were refinable. Asymmetry parameter ( $\eta_Q$ ) was fixed. |
|                  | (b) (0B, 4Si) | -2.2 (approx)        | Gaussian             |                                                                                                                                                          |

**Equations used for  $^{29}\text{Si}$  and  $^{11}\text{B}$  MAS NMR spectral deconvolution:**

$$R_{eff} = \frac{[(Na_2O) + (Li_2O) + (CaO)] - [(Al_2O_3) + (ZnO)]}{(B_2O_3)}$$

(S1)

$$K = \frac{(SiO_2)}{(B_2O_3)}$$

(S2)

$$R_{max} = \frac{1}{2} + \frac{1}{16}K$$

(S3)

$$R_{d1} = \frac{1}{2} + \frac{1}{4}K$$

(S4)

$$R_{d2} = 2 + K$$

(S5)

The fraction of  $^{[4]}\text{B}$  was calculated considering the following:

$$^{[4]}\text{B} = \frac{8 + K}{12} \left( 1 - \frac{R_{eff}}{2 + K} \right) \quad \text{if } R_{d1} < R_{eff} < R_{d2},$$

(S6)

$$^{[4]}\text{B} = R_{max} \quad \text{if } R_{max} < R_{eff} < R_{d1},$$

(S7)

$$^{[4]}\text{B} = R_{eff} \quad \text{if } R_{eff} < R_{max}.$$

(S8)

The predicted  $^{[3]}\text{B}$  fraction is therefore given in Eqn. S9, and the comparison between the predicted  $^{[4]}\text{B}$  /  $^{[3]}\text{B}$  contributions and those measured by  $^{11}\text{B}$  MAS NMR is given by Eqn. S10.

$$^{[3]}\text{B} = 1 - ^{[4]}\text{B}$$

(S9)

$$B_{Accuracy} = \frac{B_{Measured}}{B_{Predicted}}$$

(S10)
